# Supplementary material for: Watsonianone A–C, anti-plasmodial β-triketones from the Australian tree, Corymbia watsoniana
Source: Royal Society of Chemistry journal article supplement (doi:10.1039/c2ob26931g), 2012-11-22
Supplement: c2ob26931g.pdf [file c2ob26931g.pdf]

## Electronic Supplementary Information

### Watsonianone A - C, Anti-plasmodial $\beta$ -triketones from the Australian Tree, *Corymbia watsoniana*

Anthony R. Carroll, Vicky M. Avery, Sandra Duffy, Paul I. Forster and Gordon P. Guymer

|                                                                                          |            |
|------------------------------------------------------------------------------------------|------------|
| Figure 1 $^1\text{H}$ NMR spectrum of watsonianone A ( <b>1</b> ) in $\text{CDCl}_3$     | <b>S2</b>  |
| Figure 2 $^{13}\text{C}$ NMR spectrum of watsonianone A ( <b>1</b> ) in $\text{CDCl}_3$  | <b>S3</b>  |
| Figure 3 HSQC NMR spectrum of watsonianone A ( <b>1</b> ) in $\text{CDCl}_3$             | <b>S4</b>  |
| Figure 4 HMBC NMR spectrum watsonianone A ( <b>1</b> ) in $\text{CDCl}_3$                | <b>S5</b>  |
| Figure 5 COSY NMR spectrum of watsonianone A ( <b>1</b> ) in $\text{CDCl}_3$             | <b>S6</b>  |
| Figure 6 $^1\text{H}$ NMR spectrum of watsonianone B ( <b>2</b> ) in $\text{CDCl}_3$     | <b>S7</b>  |
| Figure 7 $^{13}\text{C}$ NMR spectrum of watsonianone B ( <b>2</b> ) in $\text{CDCl}_3$  | <b>S8</b>  |
| Figure 8 HSQC NMR spectrum of watsonianone B ( <b>2</b> ) in $\text{CDCl}_3$             | <b>S9</b>  |
| Figure 9 HMBC NMR spectrum watsonianone B ( <b>2</b> ) in $\text{CDCl}_3$                | <b>S10</b> |
| Figure 10 COSY NMR spectrum of watsonianone B ( <b>2</b> ) in $\text{CDCl}_3$            | <b>S11</b> |
| Figure 11 ROESY NMR spectrum of watsonianone B ( <b>2</b> ) in $\text{CDCl}_3$           | <b>S12</b> |
| Figure 12 $^1\text{H}$ NMR spectrum of watsonianone C ( <b>3</b> ) in $\text{CDCl}_3$    | <b>S13</b> |
| Figure 13 $^{13}\text{C}$ NMR spectrum of watsonianone C ( <b>3</b> ) in $\text{CDCl}_3$ | <b>S14</b> |
| Figure 14 HSQC NMR spectrum of watsonianone C ( <b>3</b> ) in $\text{CDCl}_3$            | <b>S15</b> |
| Figure 15 HMBC NMR spectrum watsonianone C ( <b>3</b> ) in $\text{CDCl}_3$               | <b>S16</b> |
| Figure 16 COSY NMR spectrum of watsonianone C ( <b>3</b> ) in $\text{CDCl}_3$            | <b>S17</b> |
| Figure 17 ROESY NMR spectrum of watsonianone C ( <b>3</b> ) in $\text{CDCl}_3$           | <b>S18</b> |

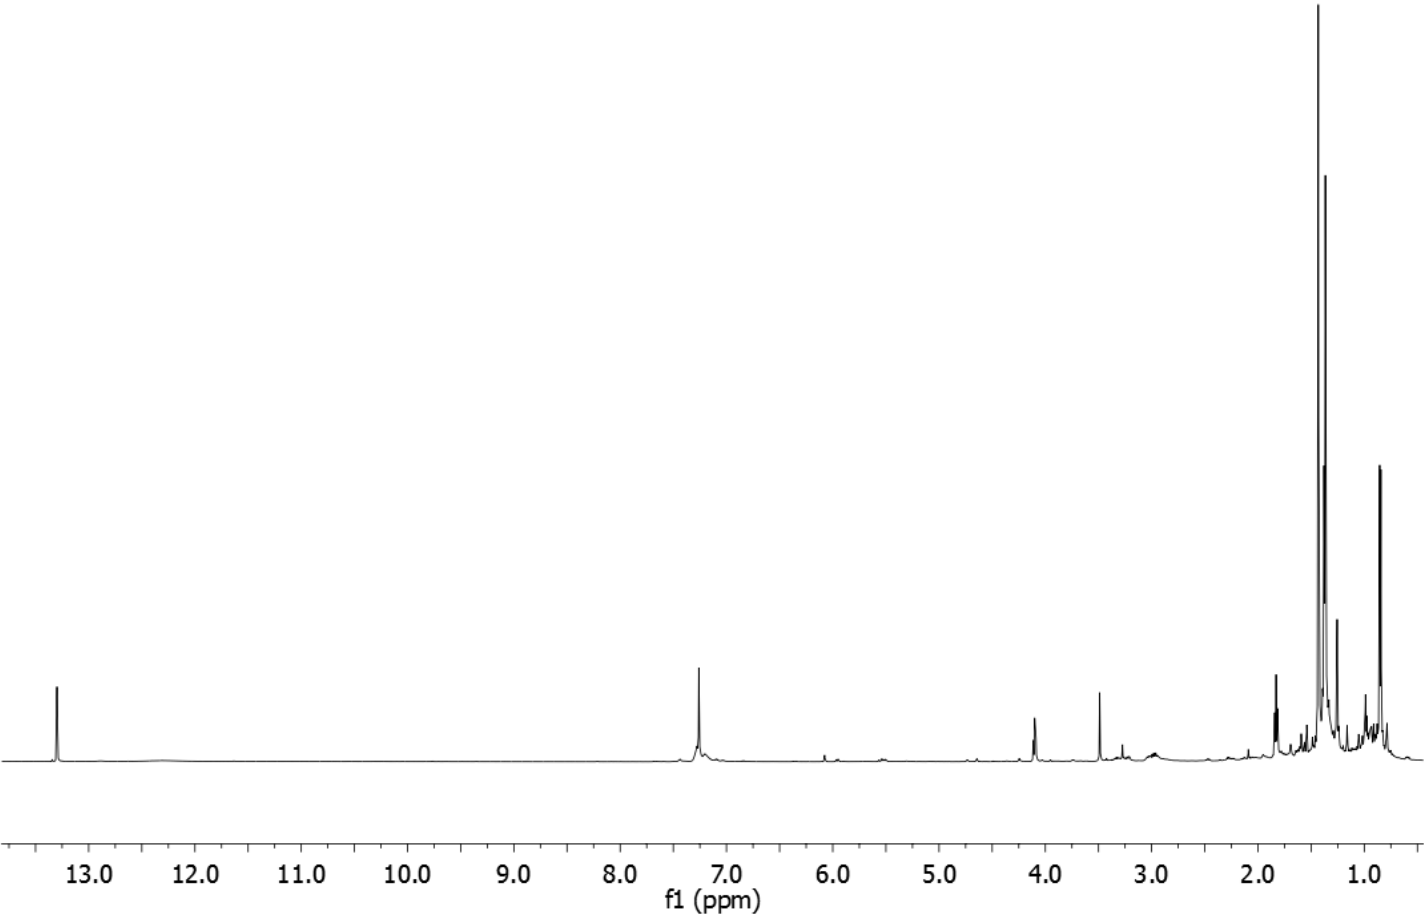

Figure 1  $^1\text{H}$  NMR spectrum of watsonianone A (**1**) in  $\text{CDCl}_3$

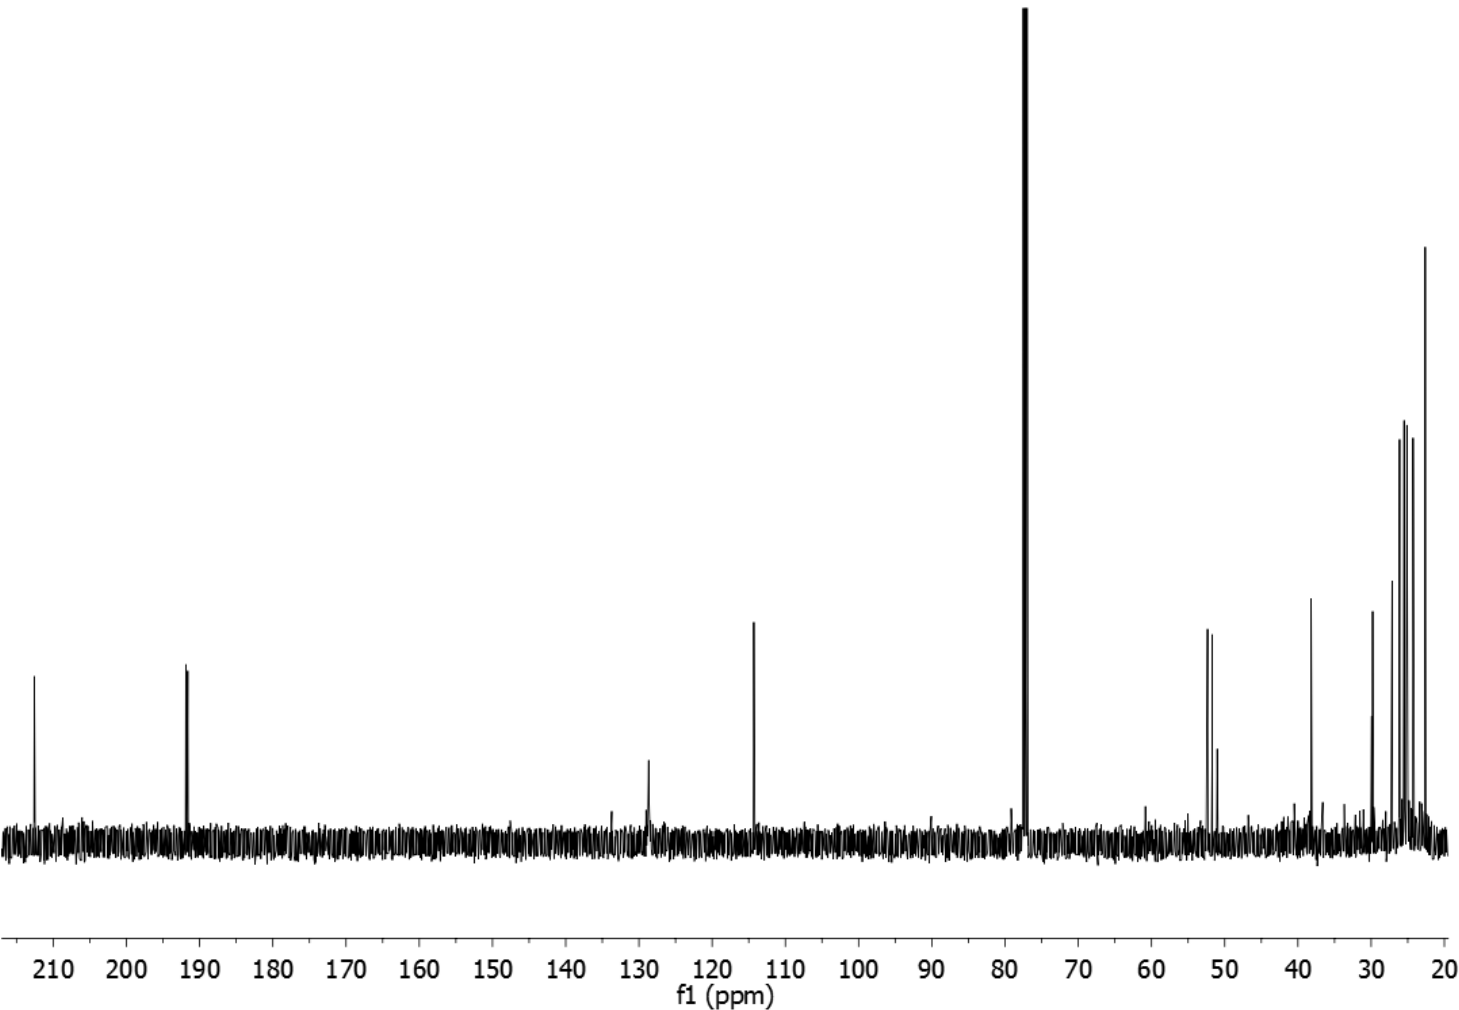

Figure 2  $^{13}\text{C}$  NMR spectrum of watsonianone A (**1**) in  $\text{CDCl}_3$

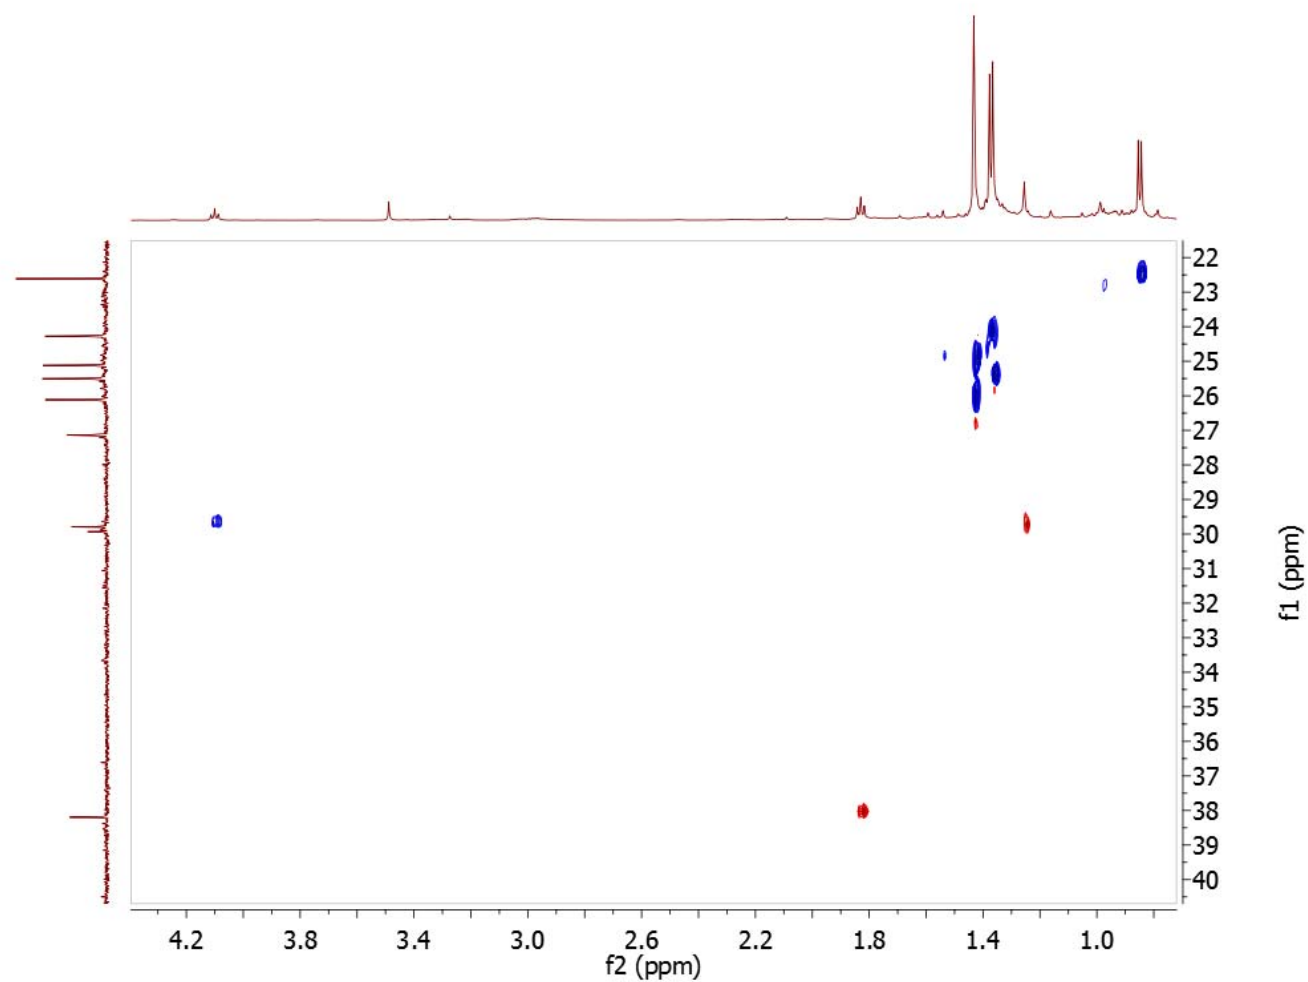

Figure 3 HSQC NMR spectrum of watsonianone A (**1**) in CDCl<sub>3</sub>

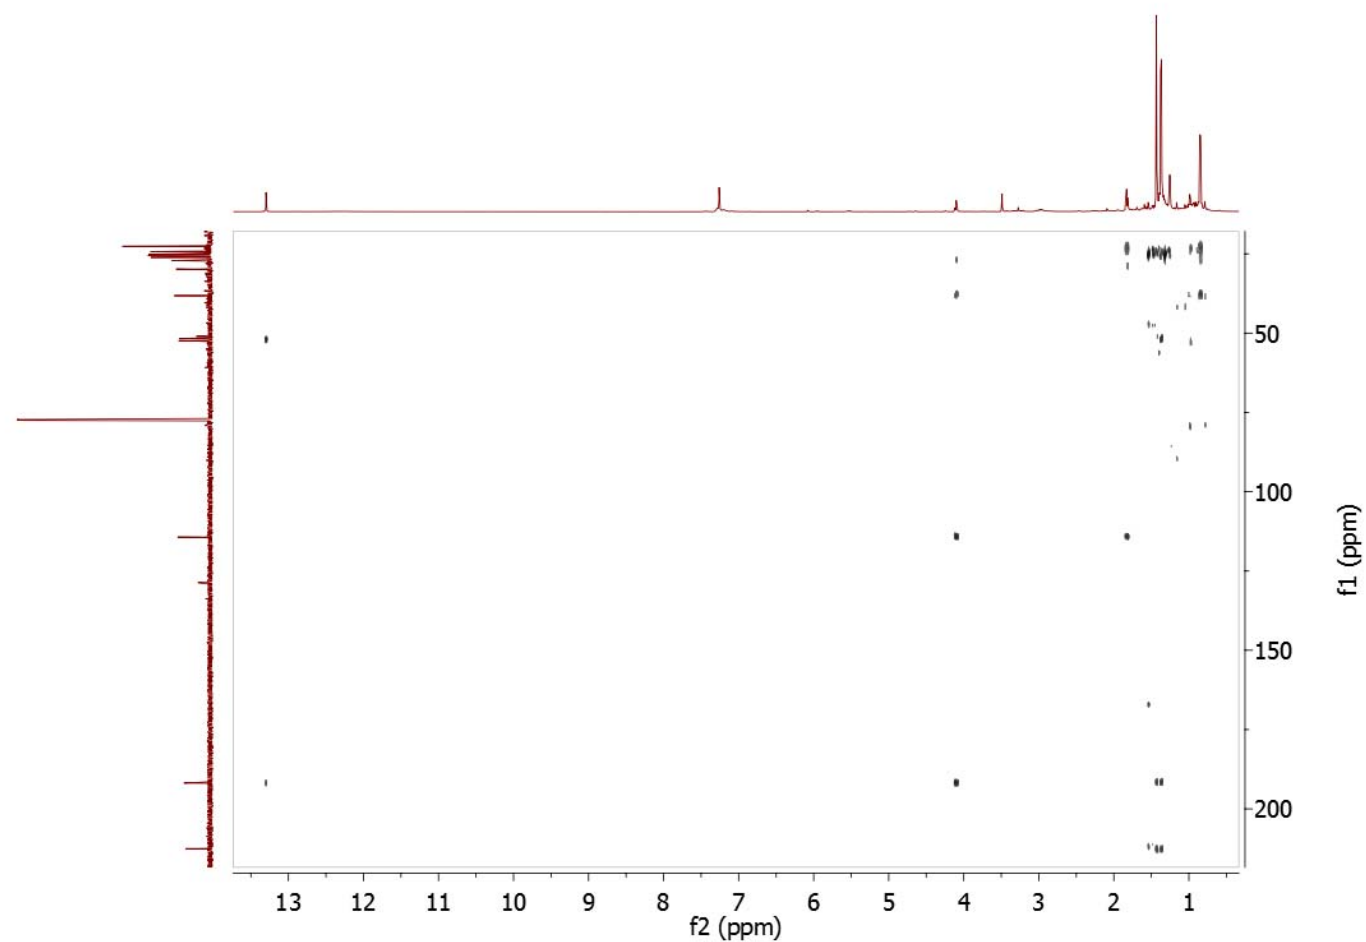

Figure 4 HMBC NMR spectrum of watsonianone A (**1**) in CDCl<sub>3</sub>

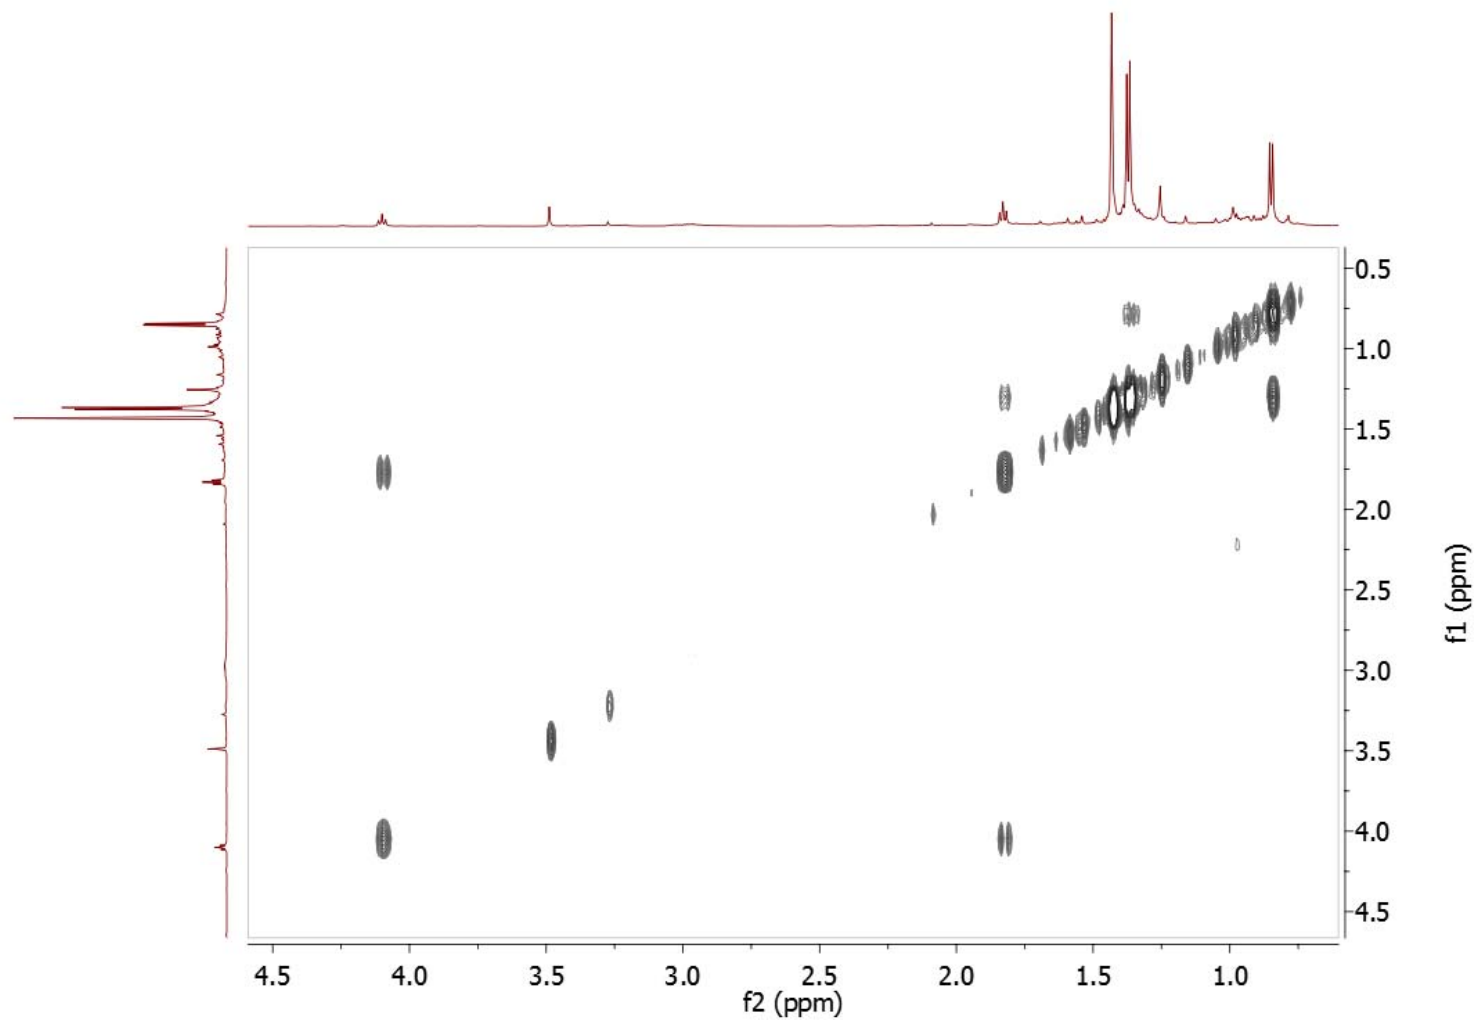

Figure 5 COSY NMR spectrum of watsonianone A (**1**) in CDCl<sub>3</sub>

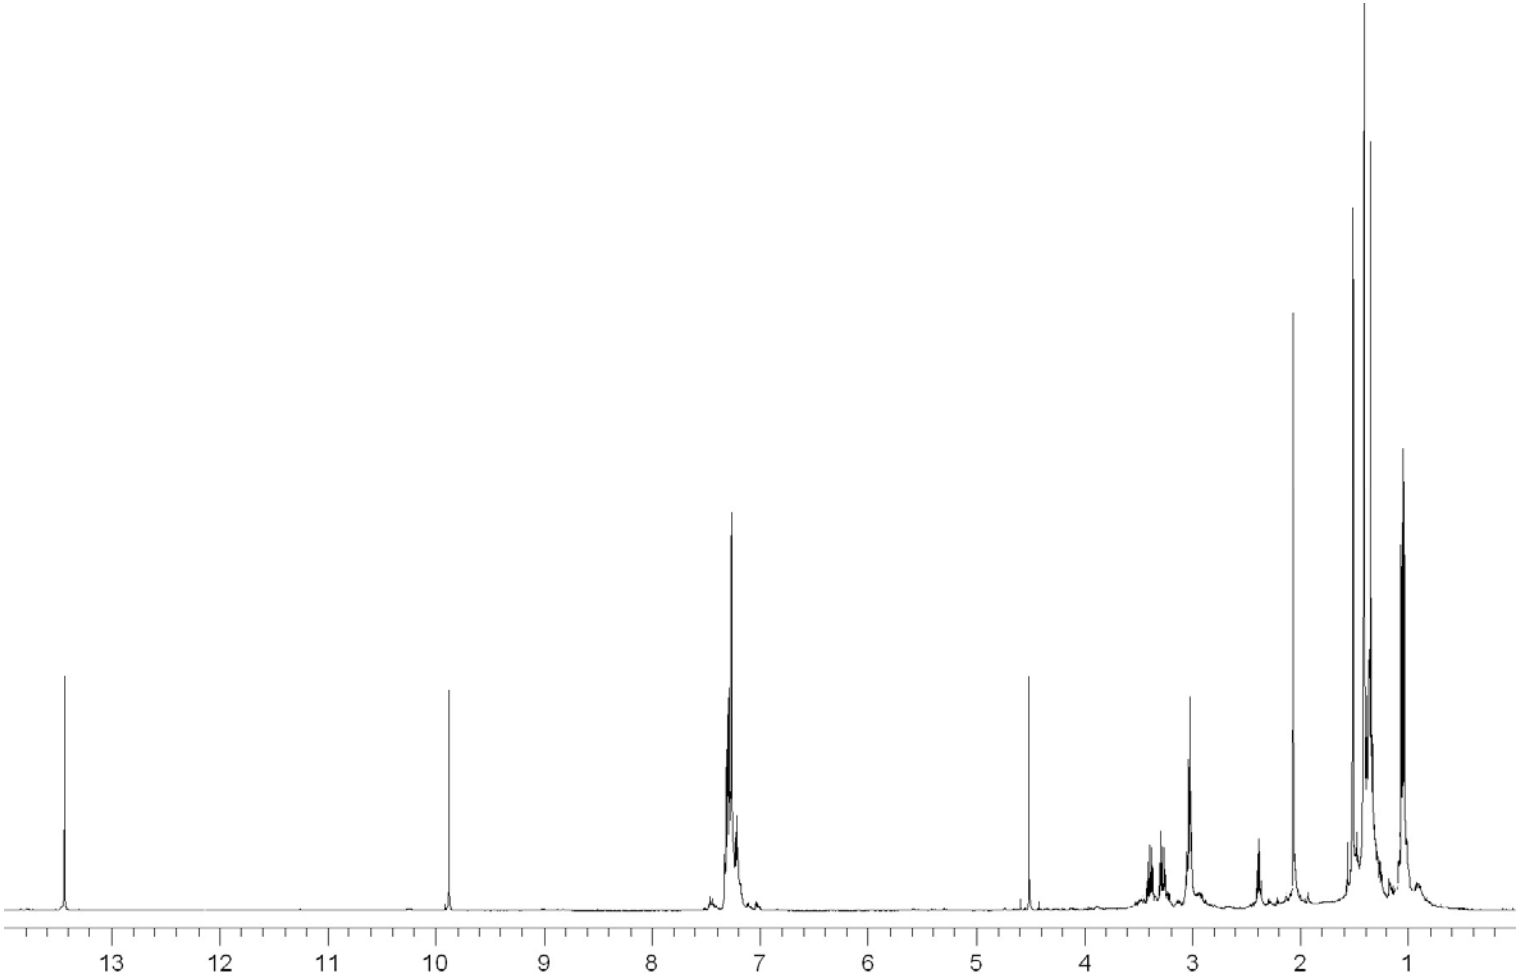

Figure 6  $^1\text{H}$  NMR spectrum of watsonianone B (**2**) in  $\text{CDCl}_3$

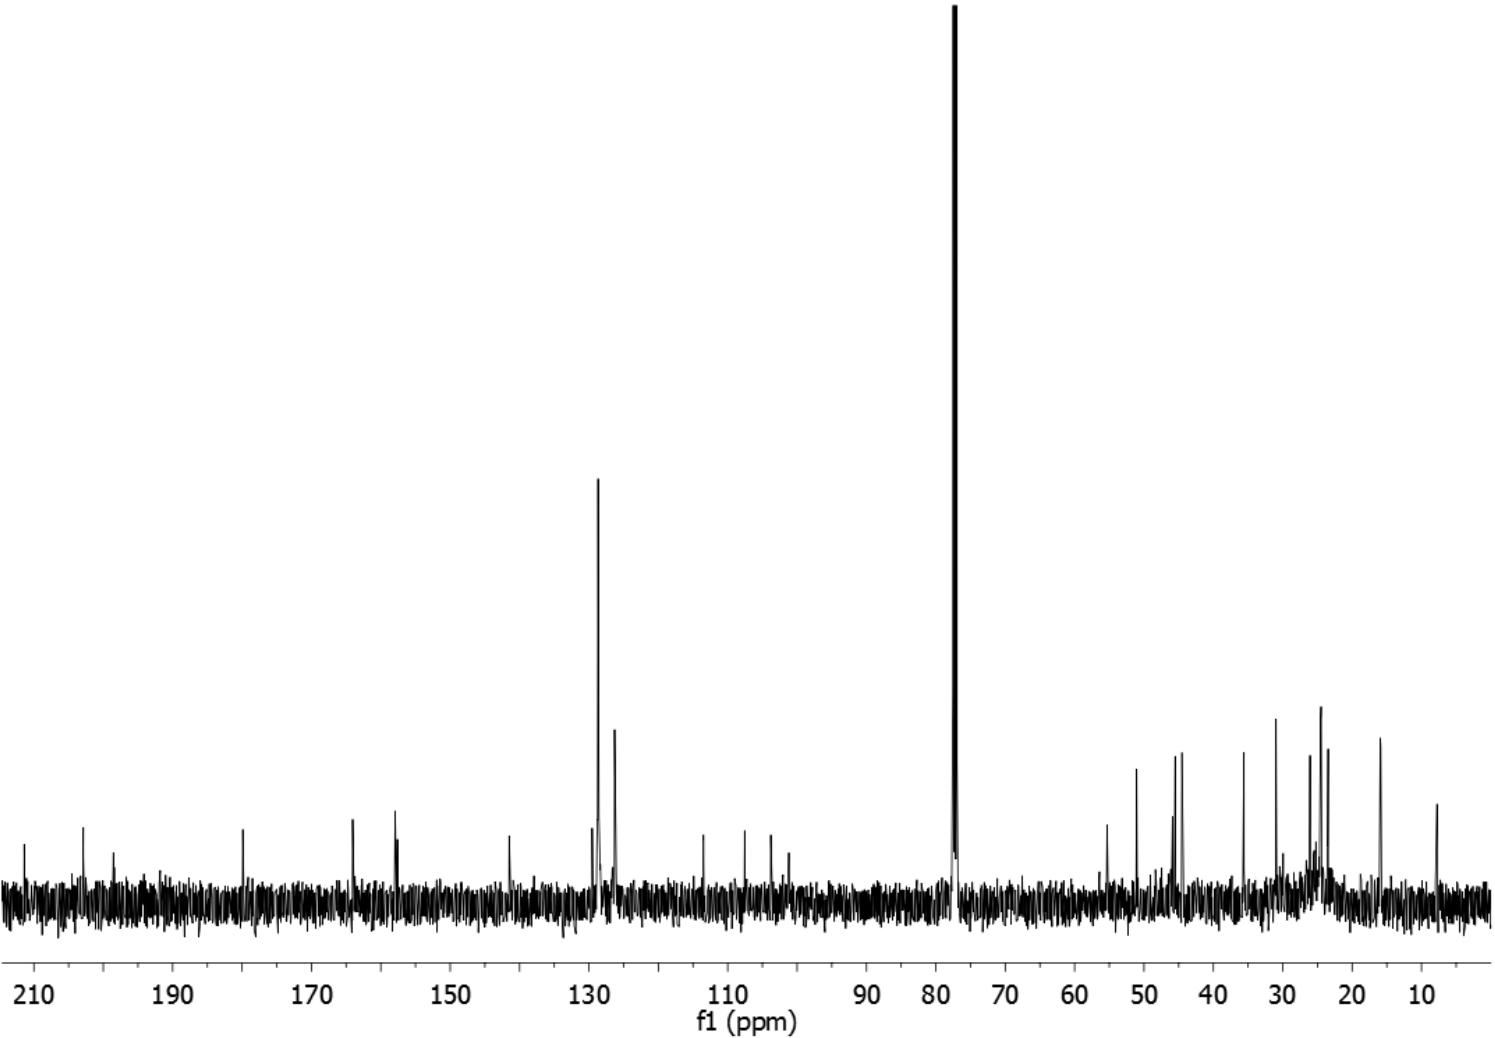

Figure 7  $^{13}\text{C}$  NMR spectrum of watsonianone B (**2**) in  $\text{CDCl}_3$

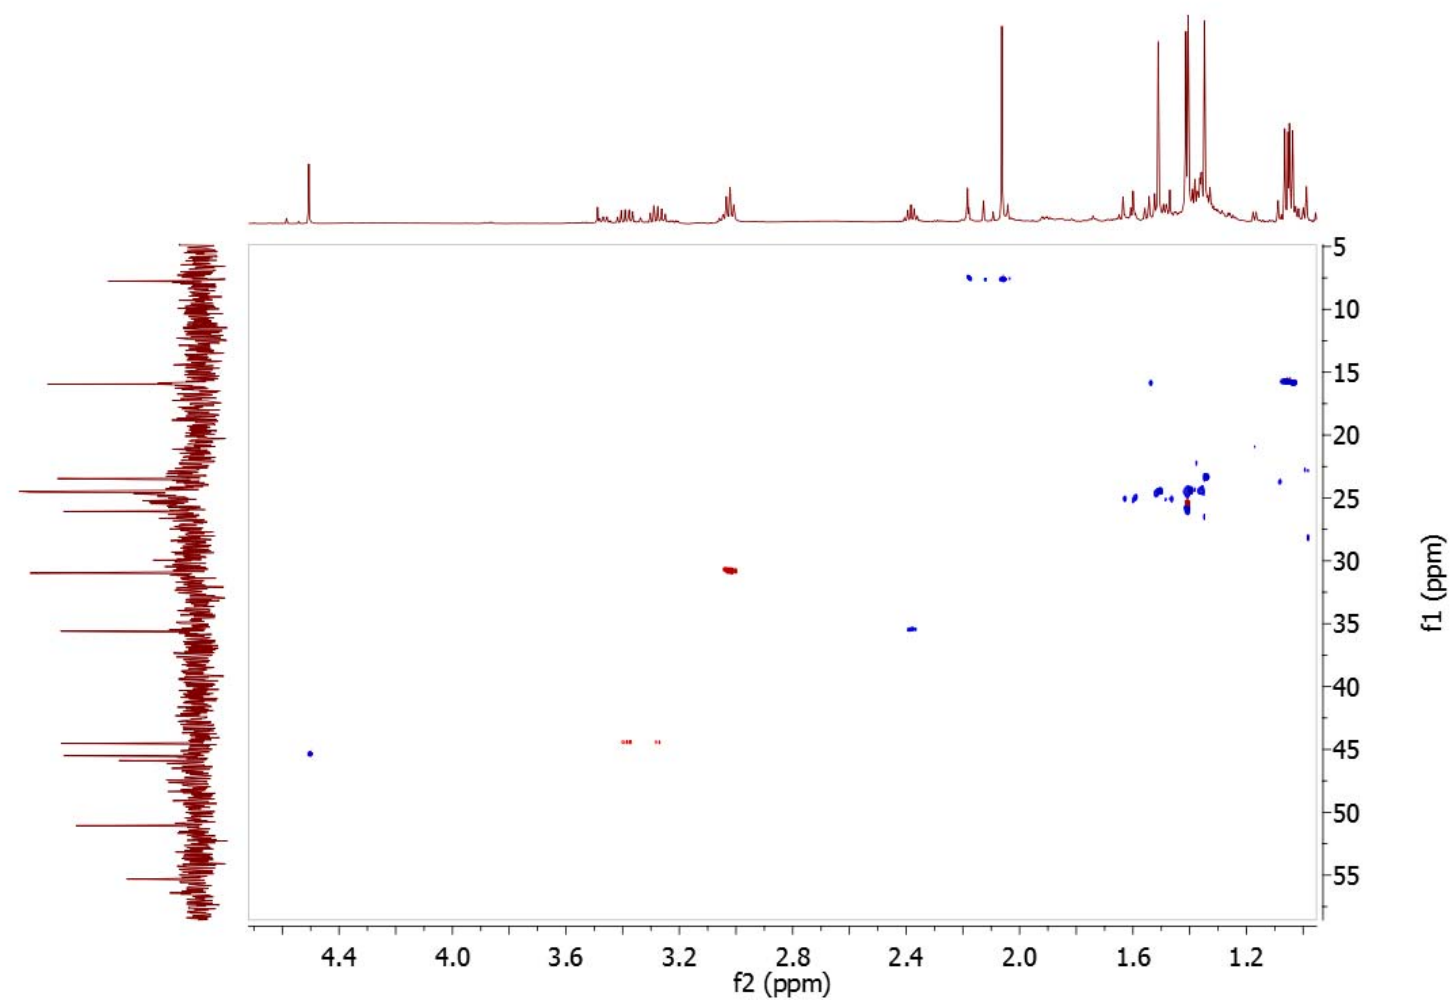

Figure 8 HSQC NMR spectrum of watsonianone B (2) in CDCl<sub>3</sub>

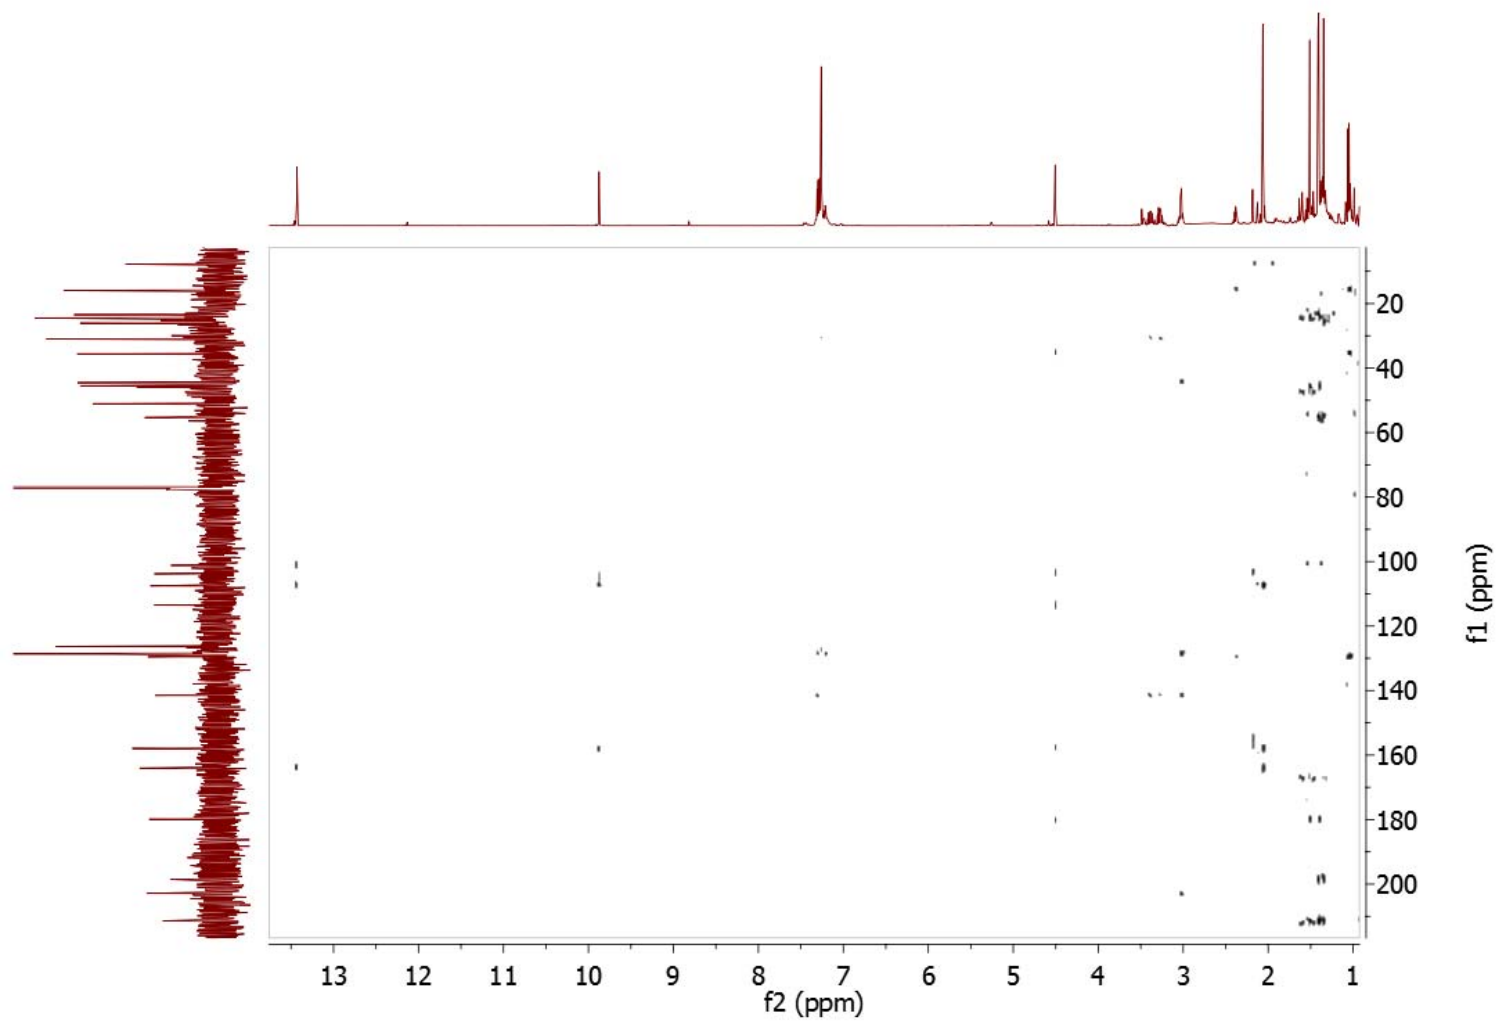

Figure 9 HMBC NMR spectrum of watsonianone B (**2**) in  $\text{CDCl}_3$

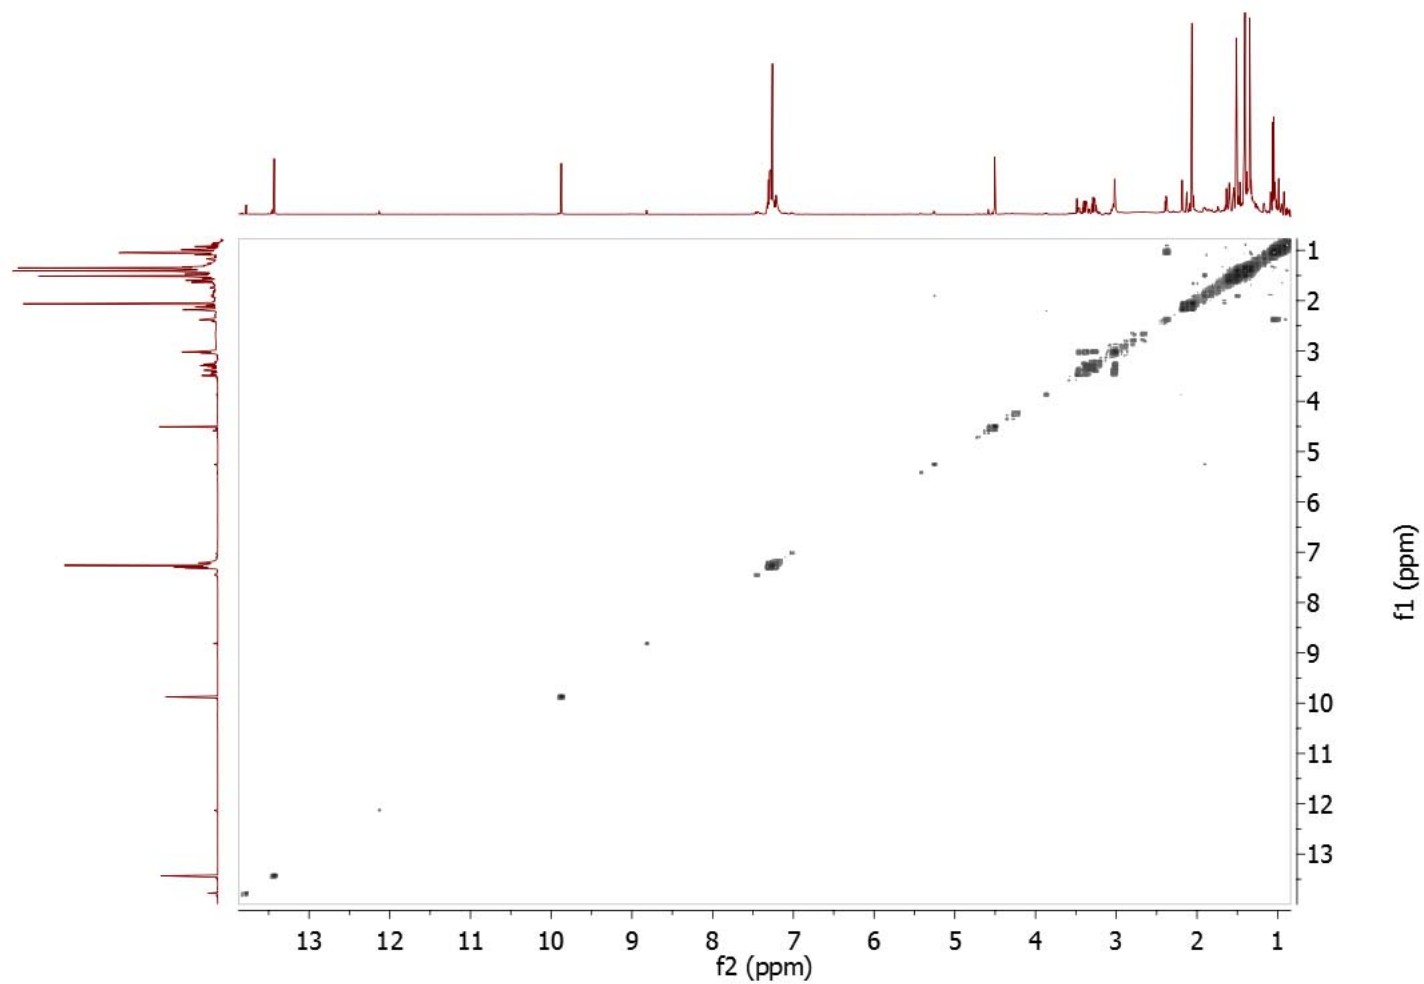

Figure 10 COSY NMR spectrum of watsonianone B (2) in CDCl<sub>3</sub>

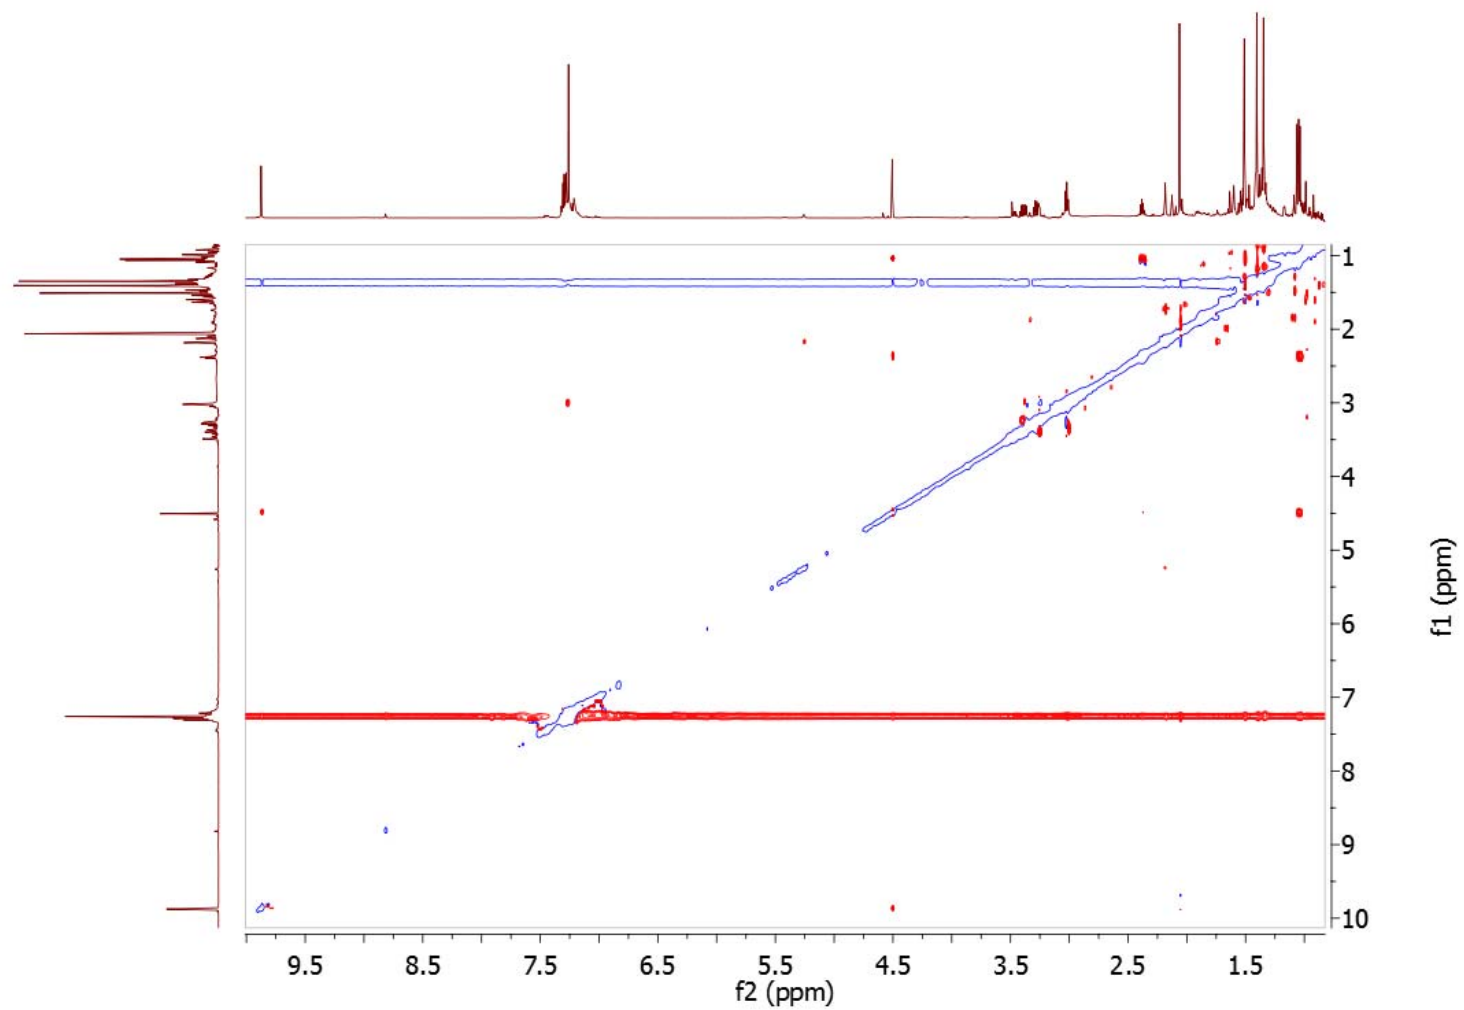

Figure 11 ROESY NMR spectrum of watsonianone B (**2**) in  $\text{CDCl}_3$

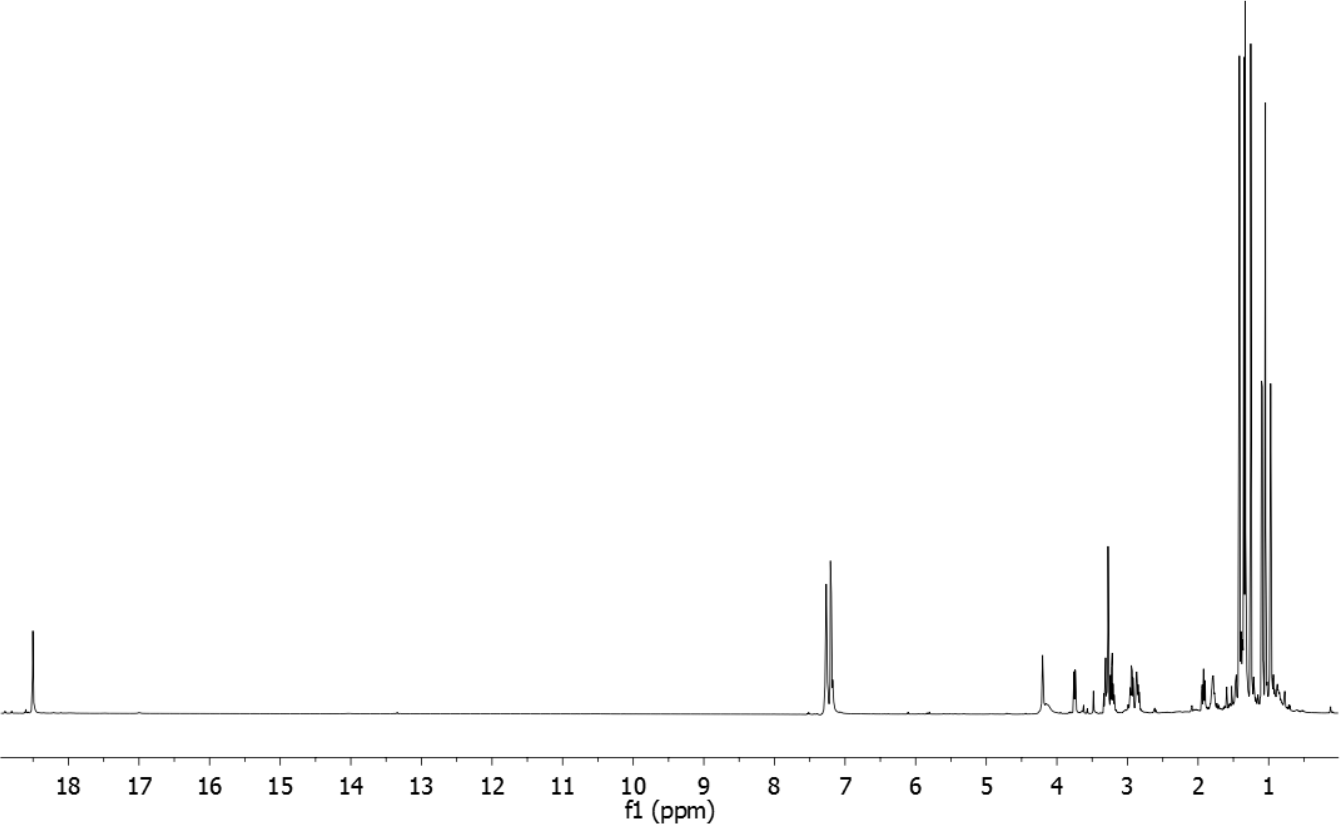

Figure 12  $^1\text{H}$  NMR spectrum of watsonianone C (**3**) in  $\text{CDCl}_3$

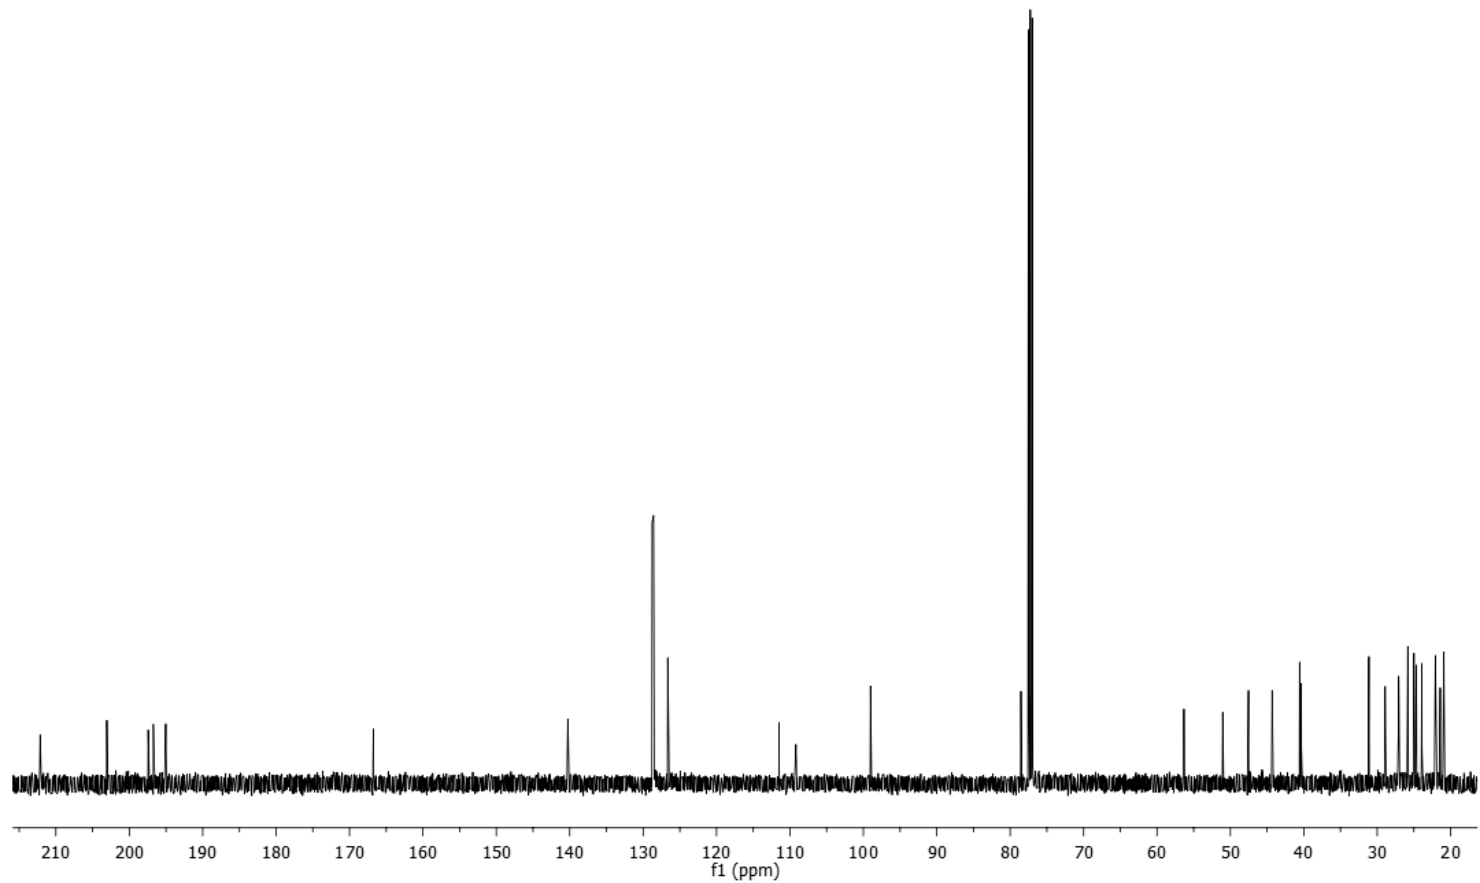

Figure 13  $^{13}\text{C}$  NMR spectrum of watsonianone C (**3**) in  $\text{CDCl}_3$

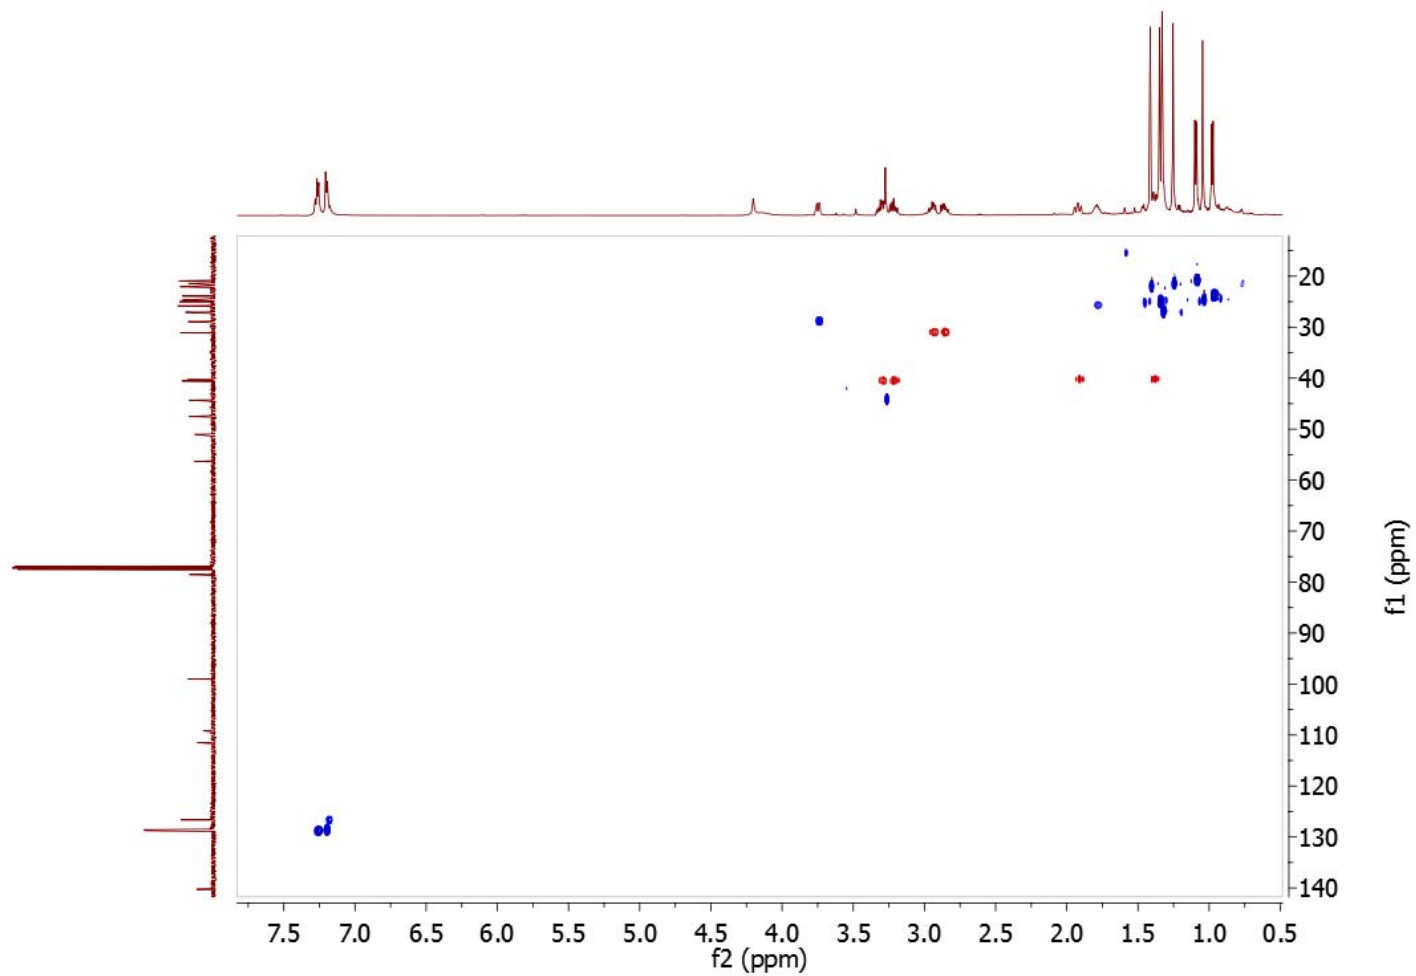

Figure 14 HSQC NMR spectrum of watsonianone C (**3**) in  $\text{CDCl}_3$

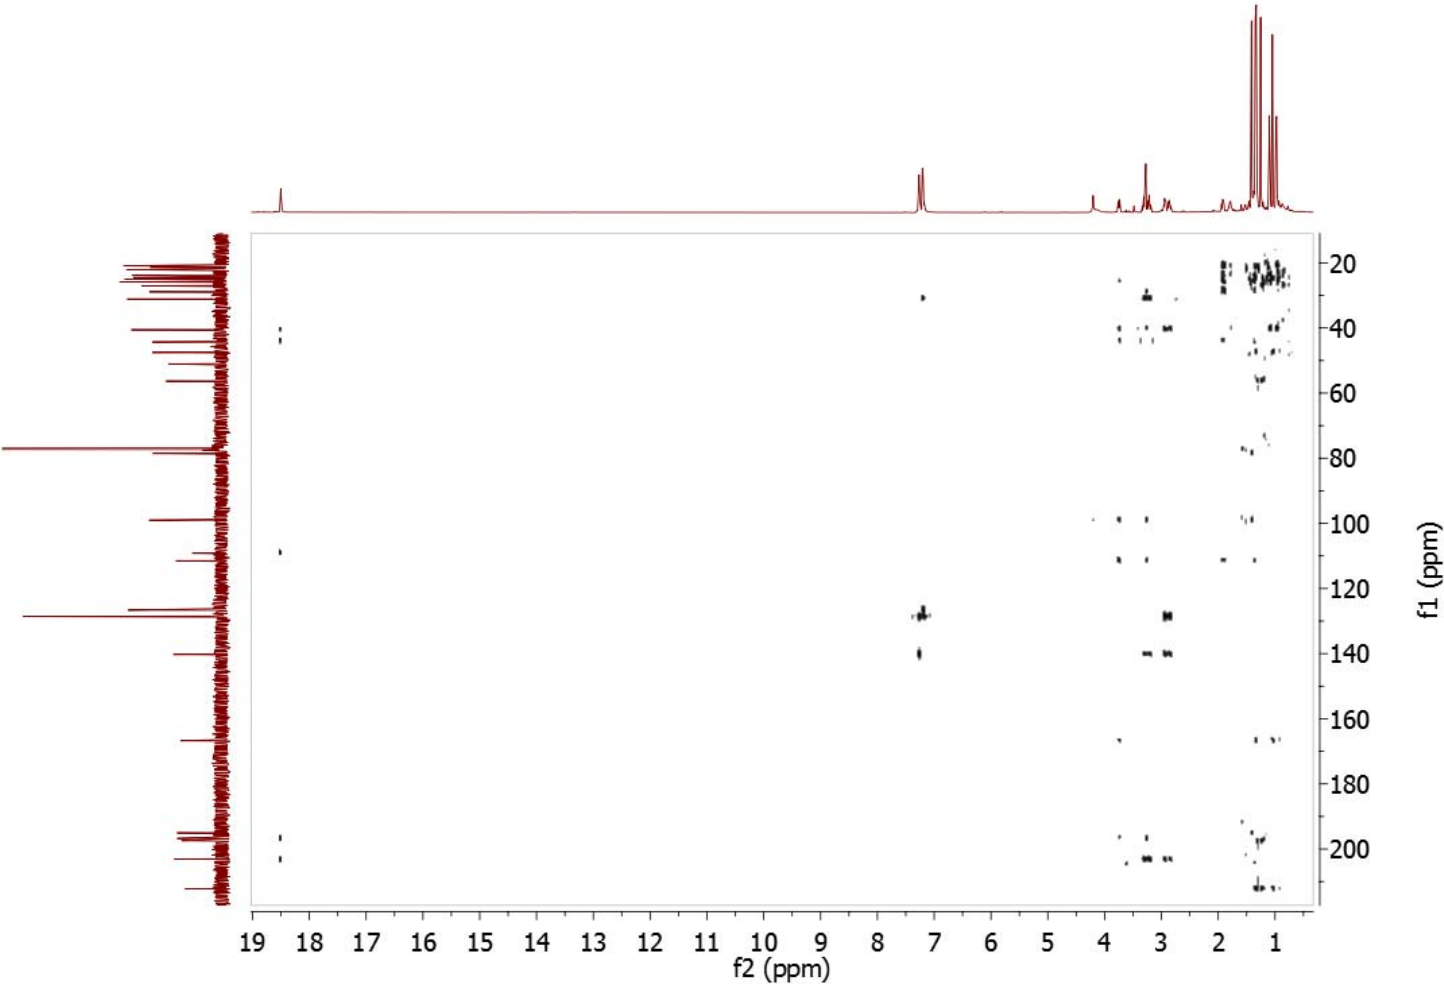

Figure 15 HMBC NMR spectrum of watsonianone C (**3**) in CDCl<sub>3</sub>

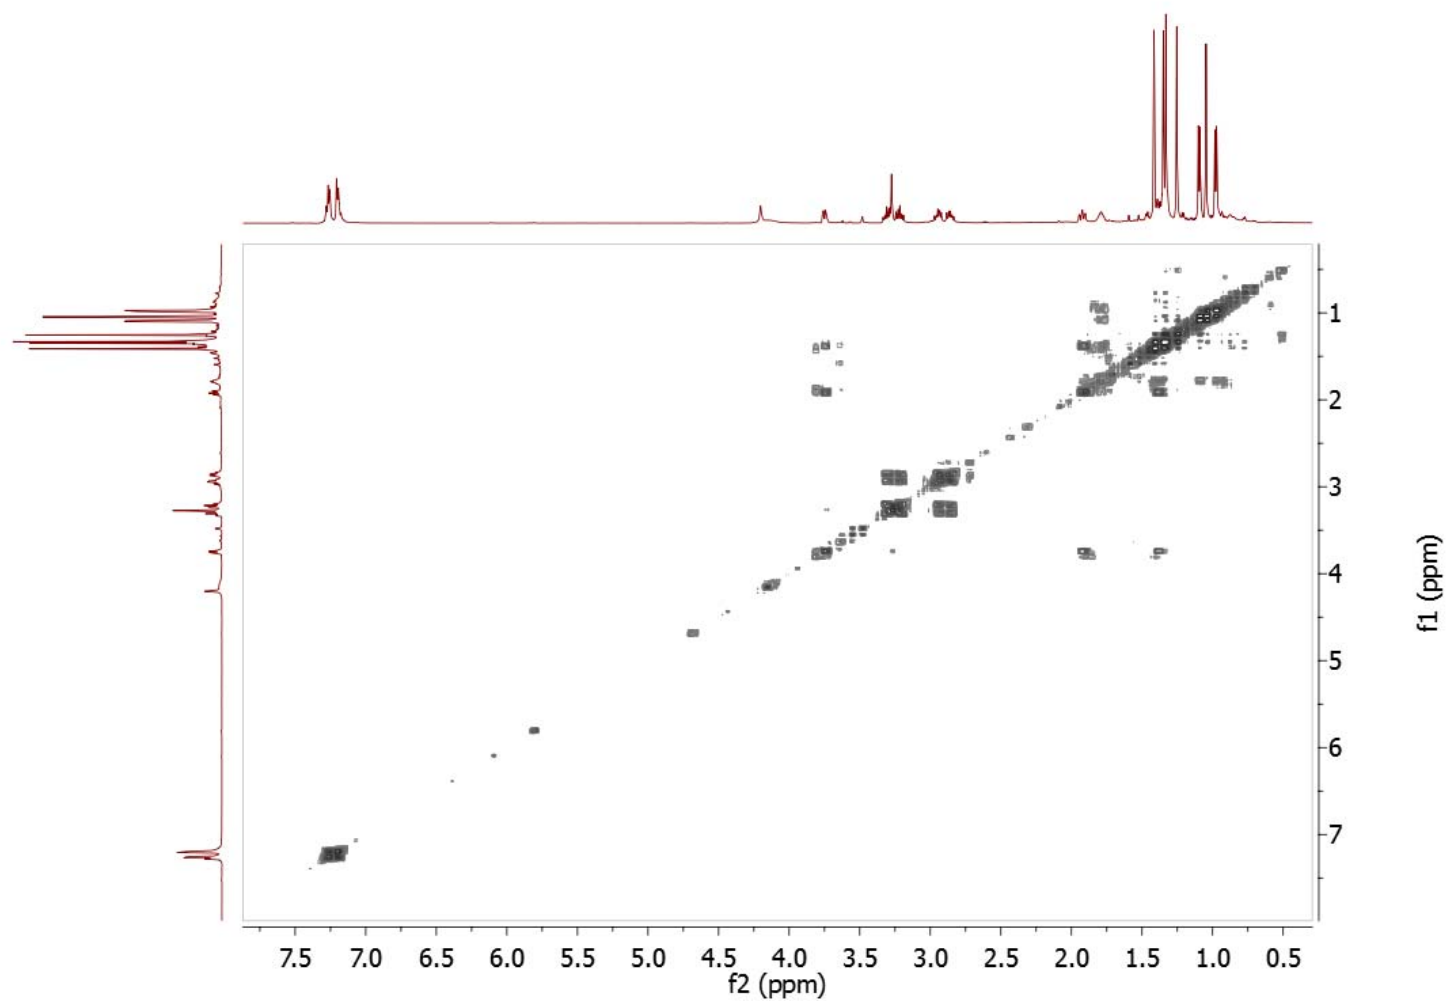

Figure 16 COSY NMR spectrum of watsonianone C (**3**) in CDCl<sub>3</sub>

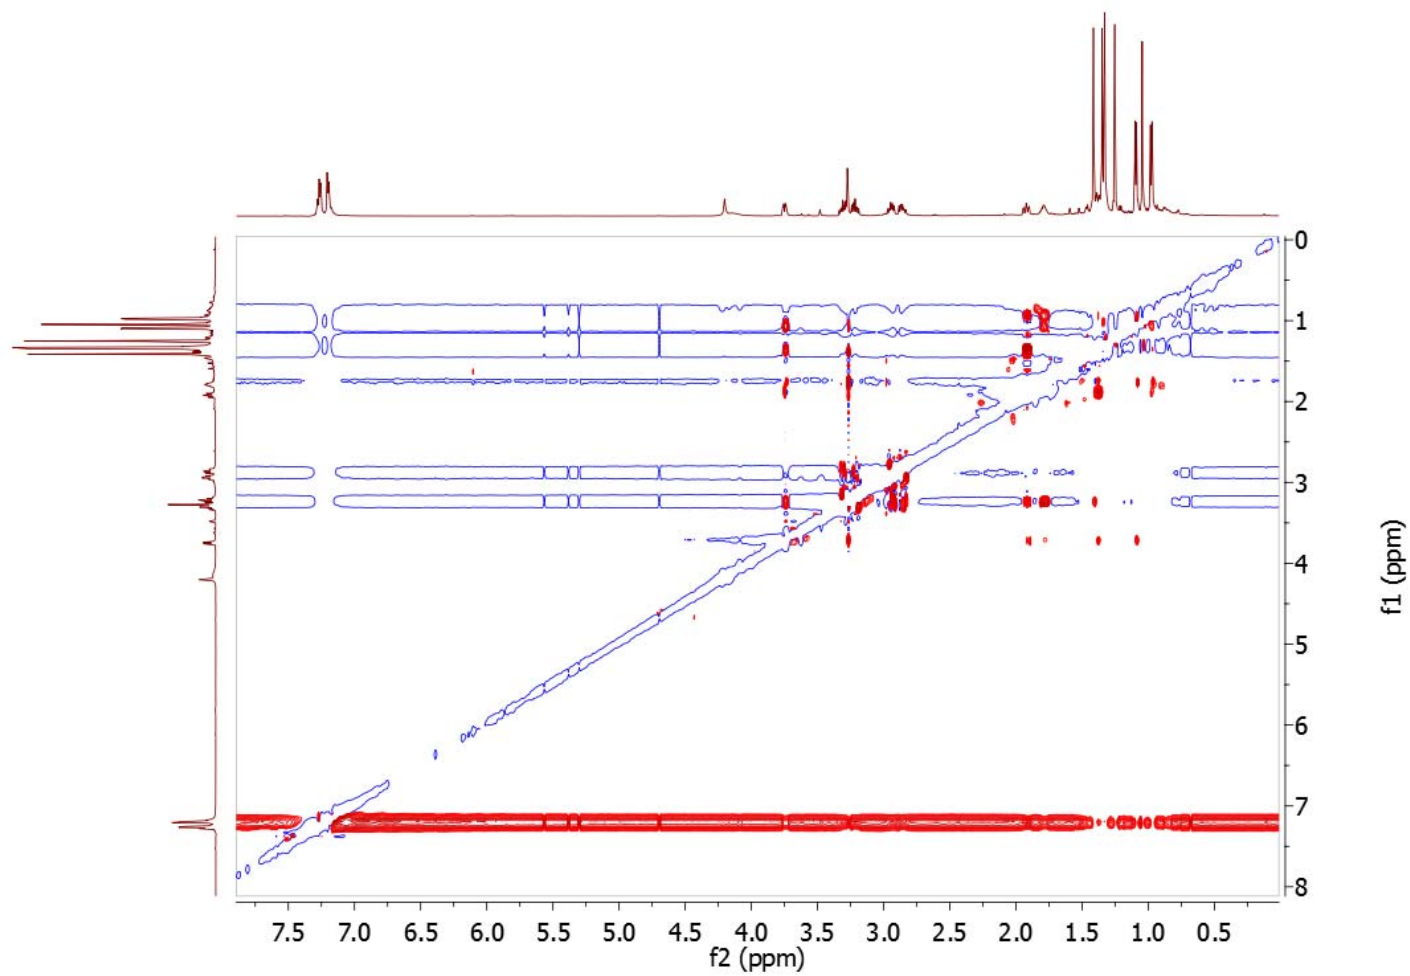

Figure 17 ROESY NMR spectrum of watsonianone C (**3**) in CDCl<sub>3</sub>
